# Supplementary material
Source: PubMed Central journal article supplement (PMC4273335)
Supplement: pnas.201417282SI.pdf [file pnas.201417282SI.pdf]

# Supporting Information

Funatsuki et al. 10.1073/pnas.1417282111

## SI Materials and Methods

**Plant Materials.** Seeds of soybean cultivars Toyomusume and Hayahikari were provided by the Hokkaido Research Organization (HRO), Japan. The residually heterozygous line HC1-85H (1), which was heterozygous only around the *qPDH1* locus, was maintained at the NARO Hokkaido Agricultural Research Center (NARO/HARC). The 85R and 85S lines, which were selfed progeny lines of HC1-85H fixed for Hayahikari and Toyomusume genotypes, respectively, were also maintained at NARO/HARC. Accessions in the mini-core collection (Table S1) were obtained from the National Institute of Agrobiological Sciences (NIAS) in Japan. Other accessions were obtained from NIAS, the US Department of Agriculture (USDA), and soybean-breeding laboratories in Japan, including HRO, as described in Table S2. These accessions included “Norin (National-elite)” cultivars comprising Japanese “old cultivars” and “modern cultivars” released between 1939 and 1962 and between 1997 and 2007, respectively.

**Growth Conditions.** Nontransformed plants were cultivated in growth chambers under a regime of 15 h of light at 22 °C and 9 h of darkness at 17 °C as described previously (2). Recombinant inbred lines (RILs) derived from the cross Toyomusume × Jack were grown in the field under the same conditions as in our previous study (3). Transformants were raised in growth chambers as described elsewhere (4). Immature pods used for *in situ* hybridization were harvested 3 wk after anthesis whereas immature pods used for expression analysis of endocarp and other tissue after suture removal (Fig. 3C) were harvested 5 wk after anthesis, a stage at which the halves could be split by hand. Other immature pods used for ORF1-expression analysis were harvested 10 d after anthesis unless described otherwise. Leaves, stems, and roots were harvested from 3-wk-old plants. Immature seeds were harvested 3 wk after anthesis. After harvest, all samples were immediately frozen in liquid nitrogen and subsequently stored at –80 °C.

**Evaluation of Shattering Resistance.** Up to 20 fully matured pods were harvested from each plant and transferred to a chamber under conditions of 30% RH and ambient temperature. Samples of different genotypes were transferred simultaneously for comparison. Three weeks and 6 wk after transfer, the number of dehiscent and indehiscent pods was recorded for each genotype. As exceptions, the pods shown in Fig. 1A and C were, respectively, stored under ambient humidity conditions (~40% and ~22% RH) in the laboratory before photographing. In addition, shattering resistance of RILs derived from the cross between Toyomusume and Jack was evaluated by heat treatment as described previously (5). The shattering scores presented in Table S2 were deposited in the Germplasm Resources Information Network ([www.ars-grin.gov/](http://www.ars-grin.gov/)) database as SHATLATE. The degrees of shattering resistance of the Japanese modern cultivars (Table S2) are cited from data deposited in the Japanese cultivars database of the Ministry of Agriculture, Forestry and Fisheries, Japan ([www.hinsyu.maff.go.jp/](http://www.hinsyu.maff.go.jp/)).

**Analyses of Pod Walls (Pod Halves) Torsion.** Pod-wall torsion angles of two-seeded pods for 85R, 85H, and 85S plants or two- and three-seeded pods for Jack and transgenic plants were measured under the 30% RH condition with an instrument composed of two blades and a rod; one blade was freely movable along, and revolvable on, the rod whereas the other was fixed to the end of the rod. For measurements, the movable and fixed blades were at-

tached to dehiscent sides of distal and basal sections, respectively, of the pod wall. The torsion angle of the pod wall corresponded to the angle formed by the two planes of the blades and was determined with the Motic Images Plus 2.0S program (Shimadzu Rika) from images recorded with a digital camera (Power Shot A570; Canon) set vertically against the rod.

**Fine Mapping of *qPDH1*.** The *qPDH1* locus was previously determined to reside in a 134-kb region flanked by DNA markers Sca184-401k and Sca184-267k (6) on chromosome 16. A population of 2,535 self-pollinated progeny of HC1-85H were used to delimit the *qPDH1* locus using a previously described method (6) with the following modifications: Plants with recombinant genotypes were cultivated in a growth chamber instead of the field, and shattering resistance was evaluated at 30% RH, rather than by heat treatment. Briefly, plants with recombinant genotypes were self-pollinated, and resulting seeds fixed for the recombinant genotype were selected. The locus was mapped by analysis of phenotypes and graphical genotypes of these lines (Fig. S2). Primer sequences of DNA markers are listed in Table S3.

**BAC Screening and DNA Sequencing.** Primers for RT-PCR of the *Pdh1* gene were used to screen for BAC clones containing the *qPDH1* locus. BAC libraries were constructed using total DNA of the SS soybean cultivar Misuzudaizu after partial digestion with *Bgl* II or *Hind* III ([www.naro.affrc.go.jp/project/results/laboratory/harc/2004/cryo04-44.html](http://www.naro.affrc.go.jp/project/results/laboratory/harc/2004/cryo04-44.html)).

Clone H88I22, from which amplified PCR products were obtained, was sequenced for the region flanked by markers Sca184\_401k and Sca184\_267k using a BigDye Terminator v3.1 cycle sequencing kit on a 3130xl Genetic Analyzer DNA sequencer (Life Technologies).

**Genomic PCR and Direct Sequencing.** To determine the genomic sequences of Hayahikari and Toyomusume, PCR was performed with LA Taq polymerase (Takara) as described previously (6). Primers were designed using the soybean genome sequence database ([www.phytozome.net/soybean](http://www.phytozome.net/soybean)) and the Primer3 program ([frodo.wi.mit.edu/](http://frodo.wi.mit.edu/)). The 25- $\mu$ L PCR mixture consisted of 200 ng of template DNA, 1 $\times$  PCR buffer, 0.4 mM dNTP mixture, 0.2  $\mu$ M forward and reverse primers, and 1.25 units of LA Taq polymerase. Amplification conditions consisted of 95 °C for 5 min, followed by 35 cycles of 98 °C denaturation for 10 s, 60 °C annealing for 30 s and 72 °C extension for 5 min, with a final step of 72 °C for 7 min. PCR products were separated on 0.8% (wt/vol) agarose, with amplified fragments of interest recovered from excised gel pieces using a QIAquick gel extraction kit (Qiagen). The isolated DNA was direct-sequenced using a DNA sequencer as described in *BAC Screening and DNA Sequencing*. To determine the genomic sequences of NIAS Japanese ([www.gene.affrc.go.jp/databases-core\\_collections\\_jg\\_en.php](http://www.gene.affrc.go.jp/databases-core_collections_jg_en.php)) and world ([www.gene.affrc.go.jp/databases-core\\_collections\\_wg\\_en.php](http://www.gene.affrc.go.jp/databases-core_collections_wg_en.php)) core accessions (7), PCR was performed with *Pdh1seq* primer pairs (Table S3) and GoTaq Hot Start Green Master Mix (Promega) following the manufacturer's protocol. Each template DNA was the same as reported previously (7). Amplification conditions consisted of 95 °C for 2 min, followed by 30 cycles of 95 °C denaturation for 30 s, 53 °C annealing for 30 s, and 72 °C extension for 90 s, with a final step of 72 °C for 5 min. After purification with ExoSAP-IT (Affymetrix), PCR products were sequenced using a BigDye Terminator v3.1 cycle sequencing kit on a 3500xl Genetic Analyzer DNA sequencer.

**RNA Extraction and Analysis.** An RNeasy plant mini kit was used in conjunction with on-column DNase I treatment according to the manufacturer's instructions (Qiagen) to isolate total RNA from plant tissues frozen in liquid nitrogen. The absence of genomic DNA contamination was confirmed by the lack of PCR amplification products using primers for *qPDH1*. First-strand cDNA was synthesized from 1 µg of total RNA using oligo(dT) primers and SuperScript III reverse transcriptase (Life Technologies). For semiquantitative analysis, RT-PCR was performed using first-strand cDNA as a template with gene-specific primers (Table S3) and AmpliTaqGold polymerase (Life Technologies), followed by agarose-gel electrophoresis to visually quantify PCR products. The same cDNA concentration was used for each sample. PCR conditions consisted of 95 °C preincubation for 5 min, followed by 27–36 cycles of 94 °C template denaturation for 30 s, 55 °C annealing for 30 s, and 72 °C extension for 30 s. Quantitative RT-PCR based on the SYBR Green I dye method was performed using first-strand cDNA as a template with gene-specific primers (Table S3) and an SYBR Premix Ex Taq II kit (Takara) on an ABI PRISM 7000 sequence detector (Life Technologies). Each of the two or three biological replicates was normalized using a cyclophilin gene (*CYP2*; TC224926) as an internal control (8). Amplifications were performed as follows: 95 °C preincubation for 3 min, followed by up to 40 cycles of 95 °C for 10 s, 55 °C for 15 s and 72 °C for 30 s. Standard curves were constructed using serially diluted cDNA.

**The 5' and 3' Rapid Amplification of cDNA Ends.** Full-length cDNA of ORF2 was isolated by 5' and 3' rapid amplification of cDNA ends (RACE). The 5' RACE was performed using gene-specific primers (Table S3) and a 5' RACE System for Rapid Amplification of cDNA Ends kit v2.0 (Life Technologies). cDNA synthesis for 3' RACE was carried out as described in the previous section, with adapter-containing oligo(dT) primers (Table S3) used instead of regular oligo(dT) primers. The adapter primers and gene-specific primers (Table S3) were used to amplify cDNA 3' ends.

**Genotyping of Soybean Accessions for the SNP in *Pdh1*.** Total DNA was isolated from seeds as described by Suzuki et al. (6) or Sayama et al. (9). PCR (94 °C for 5 min, followed by 35 cycles of 94 °C for 30 s, 60 °C for 30 s, and 72 °C for 30 s, and a final step of 72 °C for 7 min) was performed to amplify the SNP-containing region using the primers given in Table S3. The resulting products were purified using a MinElute PCR purification kit (Qiagen), followed by treatment with the restriction enzyme *Nhe* I (New England Biolabs). Digested samples were resolved by 2% or 3.5% agarose-gel electrophoresis. The following accessions were genotyped (Fig. 2E): SR cultivars Hayahikari, Harosoy, Wasekogane, Kariyutaka, Jack, Young, Yukihomare, and Tokei 992, and SS cultivars Toyomusume, Kitamusume, Enrei, Tachinagaha, Sachiyutaka, PI416937, Suzuyutaka, Shokukei 32, and Fukuyutaka (Table S2). For genotyping the SNP of the various accessions used for Fig. 4, another method based on "tetra-primer ARMS-PCR" (10) was also used (Fig. S3E). Primer sequences used are listed in Table S3.

**QTL Analysis of RILs.** A set of F<sub>4:5</sub> RILs was derived by single-seed descent from a cross between Toyomusume and Jack. Genomic DNA isolated from 126 F<sub>4</sub> plants was typed with five DNA markers on chromosome 16 (Fig. S4B). Shattering-resistance levels of F<sub>5</sub> lines were determined by heat treatment of pods harvested from mature field-grown plants as described previously (5). Simple interval mapping was performed with the recorded genotype and phenotype data using Windows Cartographer 2.5 (11) as described elsewhere (3).

**Generation of Plasmid Constructs and Plant Transformation.** A 3.4-kb genomic DNA fragment containing ORF2 from Toyomusume

was amplified by PCR using forward and reverse primers (Table S3) according to the method described in *Genomic PCR and Direct Sequencing*. PCR products were cloned into a pCR-XL-TOPO vector (Life Technologies), followed by selection of inserts containing the desired sequence. Vectors with correct inserts were subsequently digested with *Eco*RI and *Sac* I, and the resulting fragment was cloned into a pUHR plasmid vector (4) (Fig. S4A). Biolistic transformation was performed using cultured cells derived from immature embryos of the cultivar Jack as described by Nishizawa et al. (4). T<sub>0</sub> plants regenerated from hygromycin-resistant, red-fluorescent embryogenic cells were grown to maturity. Each plant was evaluated for shattering resistance. Because the SS allele behaves as a partially or nearly completely dominant gene (Fig. 1B), T<sub>0</sub> plants were used for evaluation of pod dehiscence. Total DNA and RNA were isolated from leaves and 2- to 3-wk-old pod walls, respectively.

**Alignment and Phylogenetic Analysis of the *Pdh1* Protein.** The predicted amino acid sequence of ORF2 was searched for conserved domains using the conserved domains search tool ([www.ncbi.nlm.nih.gov/Structure/cdd/wrpsb.cgi](http://www.ncbi.nlm.nih.gov/Structure/cdd/wrpsb.cgi)) against the database CDD v3.12. To construct a phylogenetic tree based on dirigent proteins, several accessions were selected from Ralph et al. (12) and from previous studies of DIR protein or gene functions (13–17). *Pdh1* and DIR protein sequences were aligned using ClustalX with default parameter values (Gonnet protein-weight matrix, gap penalty of 10.00, gap-length penalty of 0.20, and delay-divergent cutoff of 30%) (18). Phylogenetic analysis was then performed by neighbor joining using the MEGA6 program (19). The Jones–Taylor–Thornton substitution model and 1,000 bootstrap replications were used in the analysis (Fig. S5).

**In Situ Hybridization.** In situ hybridization was performed as previously reported by Kouchi and Hata (20) with a few modifications. Pods were cut into 2 × 5-mm strips, with the long side aligned with the fiber array, and fixed in FAA [5% (vol/vol) formalin, 5% (vol/vol) acetic acid, and 45% (vol/vol) ethyl alcohol] overnight at 4 °C. The samples were dehydrated in a graded ethanol series up to absolute ethanol and then a t-butanol series, and finally embedded in paraffin (Merck). Cross-sections (10 µm) across pod fiber layers were spread upon water on 3-aminopropyltriethoxysilane (APS)-coated glass slides (Matsunami) and dried overnight at 40 °C. For in situ hybridizations, samples were deparaffinized in *n*-limonene and rehydrated in a graded ethanol series up to water. Using primers listed in Table S3, a 400-bp fragment from *Pdh1* was amplified from genomic DNA using standard PCR conditions. The PCR fragment was subcloned into a pBluescript KS vector (Agilent Technologies). Digoxigenin (DIG)-labeled sense and antisense probes were prepared from the linearized plasmid by in vitro transcription with SP6 or T7 RNA polymerase using a DIG RNA labeling kit (Roche Diagnostics) according to the manufacturer's instructions.

**Microscopy for Pod-Wall Lignification.** Two- to 6-wk-old pods were examined for pod-wall lignification. Cross-sections (50 µm thick) were prepared by cutting the pods perpendicular to the pod-wall fiber orientation. Cross-sections were stained with phloroglucinol-HCl and observed under a microscope (E600; Nikon).

**Moisture Determination of Pod Walls.** Pod walls were transferred from 30% RH to 100% RH conditions, and then returned to 30% RH. Before each transfer, sample fresh weight was recorded after equilibrium was reached. Dry weight of samples was determined with an MA150 Infrared Moisture Analyzer (Sartorius). Moisture content of each sample was determined based on fresh and dry weights.

**Determination of Lignin Content.** Each pod wall sample was ground with a Wiley mill; the resulting meal was sieved to obtain a 40–80 mesh meal that was defatted in the usual fashion. This defatted meal was used for preparation of samples for lignin determination. Lignin content was obtained from the sum of acid-insoluble lignin (Klason) lignin and acid-soluble lignin contents. Acid-insoluble lignin, with ash content ignored, was determined following Dence (21). Acid-soluble lignin content was obtained by spectrophotometric measurement of absorbance at 205 nm of clear supernatant derived from the acid-insoluble lignin analysis (22). The moisture content of the pod wall meal was determined before and after defatting based on a previously described method (23).

1. Suzuki M, Fujino K, Funatsuki H (2009) A major soybean QTL, *qPDH1*, controls pod dehiscence without marked morphological change. *Plant Prod Sci* 12(2):217–223.
2. Funatsuki H, Kawaguchi K, Matsuba S, Sato Y, Ishimoto M (2005) Mapping of QTL associated with chilling tolerance during reproductive growth in soybean. *Theor Appl Genet* 111(5):851–861.
3. Yamada T, et al. (2009) A major QTL, *qPDH1*, is commonly involved in shattering resistance of soybean cultivars. *Breed Sci* 59(4):435–440.
4. Nishizawa K, Kita Y, Kitayama M, Ishimoto M (2006) A red fluorescent protein, DsRed2, as a visual reporter for transient expression and stable transformation in soybean. *Plant Cell Rep* 25(12):1355–1361.
5. Funatsuki H, et al. (2006) Simple sequence repeat markers linked to a major QTL controlling pod shattering in soybean. *Plant Breed* 125(2):195–197.
6. Suzuki M, Fujino K, Nakamoto Y, Ishimoto M, Funatsuki H (2010) Fine mapping and development of DNA markers for the *qPDH1* locus associated with pod dehiscence in soybean. *Mol Breed* 25(3):407–418.
7. Kaga A, et al. (2012) Evaluation of soybean germplasm conserved in NIAS genebank and development of mini core collections. *Breed Sci* 61(5):566–592.
8. Jian B, et al. (2008) Validation of internal control for gene expression study in soybean by quantitative real-time PCR. *BMC Mol Biol* 9:59.
9. Sayama T, et al. (2011) Development and application of a whole-genome simple sequence repeat panel for high-throughput genotyping in soybean. *DNA Res* 18(2):107–115.
10. Chiapparino E, Lee D, Donini P (2004) Genotyping single nucleotide polymorphisms in barley by tetra-primer ARMS-PCR. *Genome* 47(2):414–420.
11. Wang S, Basten CJ, Zeng Z-B (2012) *Windows QTL Cartographer 2.5* (North Carolina State University, Raleigh, NC).
12. Ralph SG, Jancsik S, Bohlmann J (2007) Dirigent proteins in conifer defense II: Extended gene discovery, phylogeny, and constitutive and stress-induced gene expression in spruce (*Picea* spp.). *Phytochemistry* 68(14):1975–1991.
13. Gang DR, et al. (1999) Regiochemical control of monolignol radical coupling: A new paradigm for lignin and lignan biosynthesis. *Chem Biol* 6(3):143–151.

**Statistical Analyses.** Comparison of two means was performed using the Student *t* test whereas comparison of multiple means was carried out using Tukey's HSD method with PROC ANOVA or PROC GLM in SAS 9.3 (SAS Institute). Although raw values are shown in the figures, percentages of dehisced pods and relative transcript levels were arcsine and logarithmically transformed, respectively, before analysis. The exceptions were shattering scores and the shattering resistance of the accessions, which were compared between the resistant and the susceptible genotypes at *Pdh1*, and between the East Asian landraces and the North American cultivars, using the Mann–Whitney *U* test.

14. Wang YP, Nowak G, Culley D, Hadwiger LA, Fristensky B (1999) Constitutive expression of pea defense gene DRR206 confers resistance to blackleg (*Leptosphaeria maculans*) disease in transgenic canola (*Brassica napus*). *Mol Plant Microbe Interact* 12:410–418.
15. Shi H, et al. (2012) Overexpression of cotton (*Gossypium hirsutum*) dirigent1 gene enhances lignification that blocks the spread of *Verticillium dahliae*. *Acta Biochim Biophys Sin (Shanghai)* 44(7):555–564.
16. Hosmani PS, et al. (2013) Dirigent domain-containing protein is part of the machinery required for formation of the lignin-based Casparian strip in the root. *Proc Natl Acad Sci USA* 110(35):14498–14503.
17. Kim KW, et al. (2012) Opposite stereoselectivities of dirigent proteins in *Arabidopsis* and *Schizandra* species. *J Biol Chem* 287(41):33957–33972.
18. Thompson JD, Gibson TJ, Plewniak F, Jeanmougin F, Higgins DG (1997) The CLUSTAL\_X windows interface: flexible strategies for multiple sequence alignment aided by quality analysis tools. *Nucleic Acids Res* 25(24):4876–4882.
19. Tamura K, Stecher G, Peterson D, Filipiński A, Kumar S (2013) MEGA6: Molecular Evolutionary Genetics Analysis version 6.0. *Mol Biol Evol* 30(12):2725–2729.
20. Kouchi H, Hata S (1993) Isolation and characterization of novel nodulin cDNAs representing genes expressed at early stages of soybean nodule development. *Mol Gen Genet* 238(1–2):106–119.
21. Dence CW (1992) Determination of acid-insoluble lignin in annual plants, developing wood, and forage. *Methods in Lignin Chemistry*, eds Lin SY, Dence CW (Springer, Berlin), pp 41–42.
22. Dence CW (1992) Determination of acid-soluble lignin in wood and pulp. *Methods in Lignin Chemistry*, eds Lin SY, Dence CW (Springer, Berlin), pp 39–40.
23. Kuroda K (2000) [Principal component analysis. *Wood Science Experiment Manual*], ed Japan Wood Research Society (Bun-eido Publishing, Tokyo), pp 92–97. Japanese.
24. Gao M, Zhu H (2013) Fine mapping of a major quantitative trait locus that regulates pod shattering in soybean. *Mol Breed* 32:485–491.

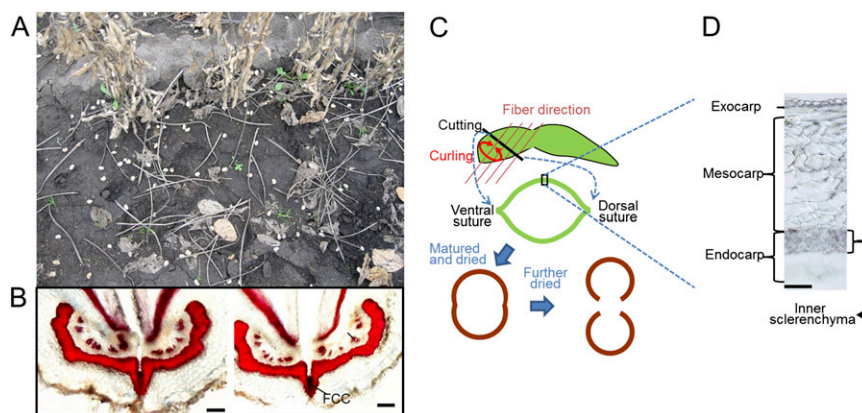

**Fig. S1.** Soybean pods and pod dehiscence. (A) Dehisced pods and shed seeds of an SS line in the field. (B) Light micrographs of cross-sections of mature soybean pod dorsal sutures. Figure courtesy of ref. 1. Pod halves (pod walls) seem to be bound tightly to each other by fiber-cap cells (FCCs) in both 85R [the NIL of the SR genotype (Left)] and 85S [the NIL of the SS genotype (Right)]. (Scale bar: 100  $\mu$ m.) (C) Schematic illustration of a soybean pod wall. (Top) Whole pod wall, and fiber (red lines) and cutting (black line) directions; (middle) cutting plane and site of section; (bottom) cutting planes before and after pod dehiscence (left and right, respectively) at low humidity. (D) Cross-section of a 5-wk-old pod wall. (Scale bar: 100  $\mu$ m.) Most of the inner part of the endocarp was so fragile that it collapsed during cross-section preparation. The highest cell density and the thickest cell walls are seen in inner sclerenchyma, suggesting the crucial role of this tissue in determining pod wall shape (see also Fig. 3D).

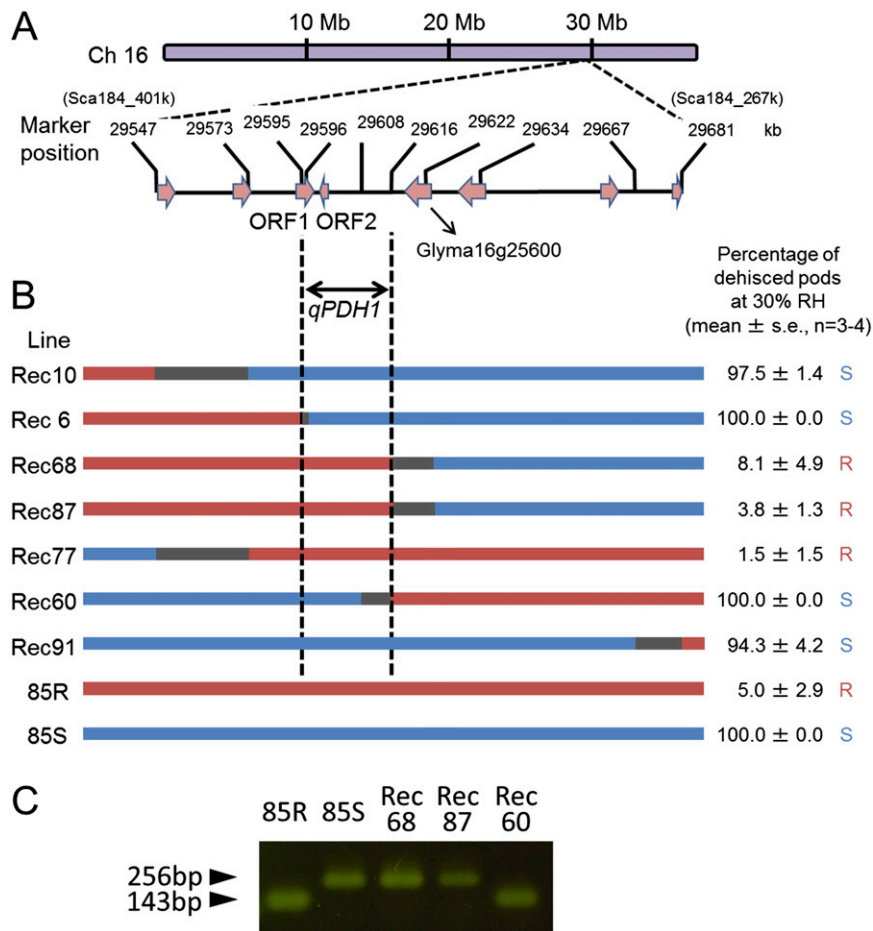

**Fig. S2.** Fine mapping of *qPDH1*. (A) Physical map and predicted ORFs (pink arrows) in a chromosome-16 134-kb genomic region flanked by *Sca184\_401k* and *Sca184\_267k* marker loci, onto which *qPDH1* had been previously mapped. (B) Graphical genotypes and degree of pod dehiscence of NILs derived from HC1-85H and carrying a recombination site in the 134-kb genomic region. Marker names and positions correspond to those in Table S3. The 85R and 85S are lines in which the genomic region was fixed for Hayahikari (resistant) and Toyomusume (susceptible) genotypes, respectively. Red and blue bars indicate genomic fragments derived from Hayahikari and Toyomusume, respectively; the gray bar indicates the occurrence of a recombination event somewhere in that region, as deduced from flanking marker genotypes. The genotype at the *qPDH1* locus, determined based on the degree of pod dehiscence ( $n = 3-4$ ), is indicated for each line: *R* or *S*, corresponding to Hayahikari and Toyomusume genotypes, respectively. The candidate genomic region for *qPDH1* was localized to a 20-kb region flanked by 29595 and 29616 markers. (C) Indel polymorphism in *Glyma16g25600* among several NILs used for fine mapping. Although the genotype with the deletion was characteristic of SR accessions in a previous study (24), lines with a gap in the present study were not necessarily SR.

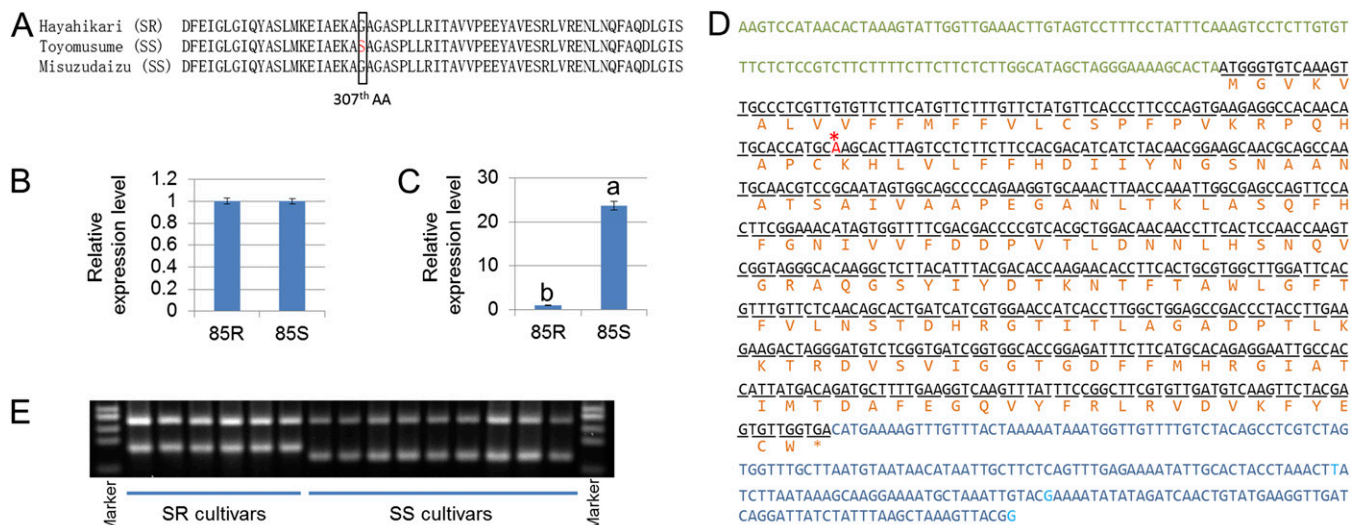

**Fig. S3.** Characterization of ORF1 and -2. (A) Alignment of peptide sequences predicted from partial ORF1 (Glyma16g25570.1; GRAS family transcription factor) sequences containing an amino acid substitution between Hayahikari (SR) and Toyomusume (SS). The predicted peptide sequence of Misuzudaizu (SS) is additionally aligned. The amino acid substitution site is boxed. (B) Comparison of relative ORF1 transcript levels between 85R and 85S. Expression levels were determined by quantitative RT-PCR using *CYP2* as a reference. Means and SE with two biological replicates are indicated by blue boxes and black bars, respectively. (C) Comparison of relative ORF2 transcript levels between 85R and 85S, determined by quantitative RT-PCR using *cyclophilin 2* (*CYP2*) as a reference (mean  $\pm$  SE;  $n = 2$ ). Different letters indicate significant difference ( $P < 0.01$ ) between genotypes. (D) Full-length cDNA sequence and predicted amino acid sequence of *Pdh1* of Toyomusume (SS). Green, black, and blue letters represent 5' UTR, coding, and 3' UTR sequences, respectively. The SNP site conditioning shattering resistance is indicated by a red asterisk. Light-blue letters represent multiple sites followed by poly-A tails. The predicted amino acid sequence is represented by orange letters below the coding sequence. (E) Genotyping of ORF2 (*Pdh1*) by "tetra-primer ARMS-PCR." SR and SS genotypes yielded specific products of 169 bp and 146 bp, respectively, with a common band of 262 bp. Markers,  $\Phi$ X174/*Hae*III. SR cultivars: Hayahikari, Harosoy, Wasekogane, Kariyutaka, Jack, and Yukihomare. SS cultivars: Toyomusume, Kitamusume, Enrei, Tachinagaha, Sachiyutaka, PI416937, Suzuyutaka, Shokukei 32, and Fukuyutaka.

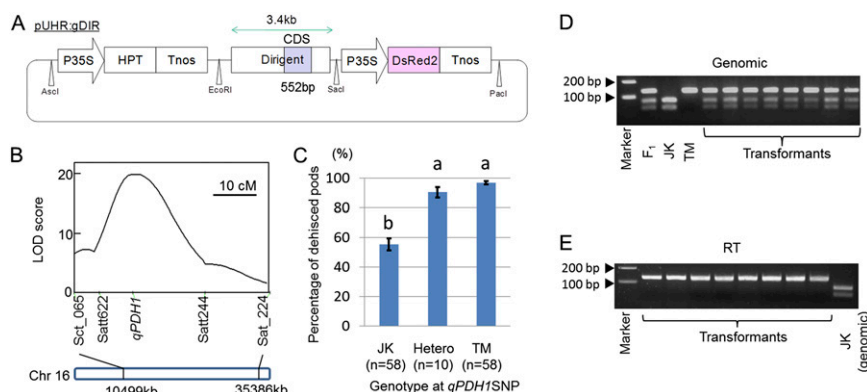

**Fig. S4.** Transformation of an SR cultivar, Jack (JK), with a functional *Pdh1* gene derived from the SS cultivar Toyomusume (TM). (A) Plasmid construct used for biolistic transformation. (B) Interval mapping of pod dehiscence on chromosome 16 in an  $F_4$  population derived from the cross Toyomusume  $\times$  Jack. (C) Degree of pod dehiscence of  $F_4$  lines according to genotype at *qPDH1*. Bars represent SE. (D) *Nhe* I digestion of PCR products containing the SNP of *qPDH1* in the genomic template. Plants selected for both hygromycin resistance and red fluorescence carried the ORF2 sequence from Toyomusume. (E) *Nhe* I digestion of PCR products containing the SNP of *qPDH1* in the cDNA template. All transformants expressed transcripts of ORF2 in their pod walls. Digested PCR product from the Jack genomic template was used as a reference.

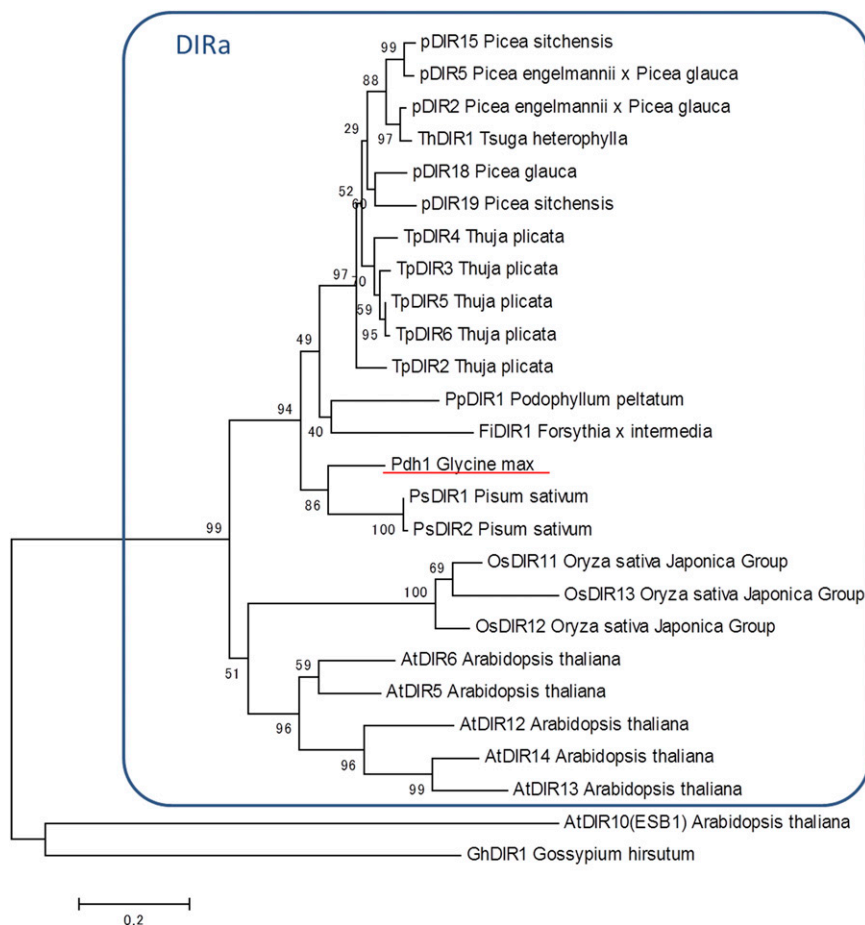

**Fig. S5.** Phylogenetic tree derived from analysis of predicted amino acid sequences of Pdh1 and dirigent(-like) protein sequences belonging to the DIRa subfamily published in Ralph et al. (12) and DIR proteins associated with lignin deposition. Protein sequences were retrieved from the National Center for Biotechnology Information (NCBI). DIR nomenclature follows Ralph et al. (12). Except for Pdh1, deduced amino acid sequences of the 56 dirigent-like protein genes predicted in the soybean genome assembly (Glyma1 by Phytozome) are not included in the tree. Although a genomic region on chromosome 2 is highly similar to the region carrying *pdh1* on chromosome 16, no ORF is predicted in this region in Glyma1.

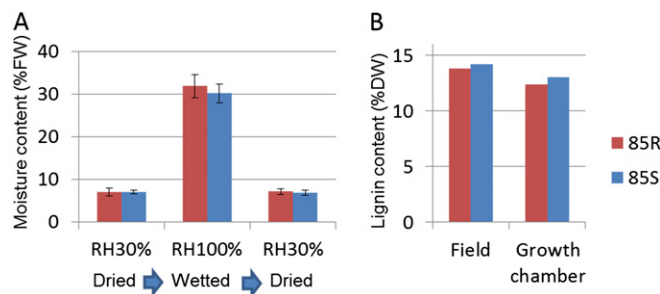

**Fig. S6.** Comparison of pod-wall characteristics of NILs for *Pdh1*. (A) Moisture content of pod walls of 85R and 85S. Pod-wall weights were measured after stabilization at each humidity condition. Pod walls were then dried at 105 °C, with weights and moisture content subsequently determined. (B) Lignin content of pod walls of 85R and 85S. Analysis of variance revealed a significant effect ( $P < 0.05$ ) of growth environment but not of genotype.

**Table S1. Soybean accessions of the mini-core collection and their sequences of *Pdh1***

| Accession no.*     | Accession name               | Country | Sequence <sup>†</sup> |
|--------------------|------------------------------|---------|-----------------------|
| Japanese landraces |                              |         |                       |
| JP28880            | KITAJIRO                     | Japan   | S-t                   |
| JP29621            | KANAGAWA WASE                | Japan   | S-t                   |
| JP28507            | JU.K.KOKU                    | Japan   | S-t                   |
| JP28214            | KUROGOYOU                    | Japan   | S-t                   |
| No. N/A            | KOITO                        | Japan   | S-t                   |
| JP30135            | KURODAIZU(AO HIGUU CHUU)     | Japan   | S-t                   |
| JP53292            | YAKUMO MEAKA                 | Japan   | S-t                   |
| JP73172            | NATTOUMAME                   | Japan   | S-m                   |
| JP28922            | KOIBUCHIMURA ZAIRAI          | Japan   | S-t                   |
| JP28869            | DATE CHA MAME                | Japan   | S-t                   |
| JP27922            | TAKIYA                       | Japan   | S-t                   |
| JP28474            | SHAKKIN NASHI                | Japan   | S-t                   |
| JP27920            | AKITA ANI                    | Japan   | S-t                   |
| JP35409            | HIKU ANDA                    | Japan   | S-m                   |
| JP27948            | FU.K.UI SHIRO                | Japan   | S-t                   |
| JP29500            | KISAYA(NATSU)                | Japan   | S-t                   |
| JP27900            | ABURA MAME                   | Japan   | S-t                   |
| JP28996            | SHAKUJOU MAME                | Japan   | S-m                   |
| JP29210            | YAHAGI                       | Japan   | S-t                   |
| JP28252            | SOKOSHIN                     | Japan   | S-t                   |
| JP28947            | SHIMO HISAKATA DAIZU         | Japan   | S-t                   |
| JP73030            | KOMAME                       | Japan   | S-t                   |
| JP67658            | AZEMAME                      | Japan   | S-t                   |
| JP76512            | AOBAKO                       | Japan   | S-t                   |
| JP28049            | MEGURO 1                     | Japan   | S-t                   |
| JP27974            | OOJIRO                       | Japan   | S-t                   |
| JP28770            | HOJAKU                       | Japan   | S-t                   |
| JP29253            | ZAIRAI 51-2                  | Japan   | S-t                   |
| JP27890            | CHADAIZU                     | Japan   | S-t                   |
| JP28914            | IHHON SANGOU                 | Japan   | S-m                   |
| JP76514            | HITORIMUSUME                 | Japan   | S-t                   |
| JP29346            | AKASAYA                      | Japan   | S-m                   |
| JP85549            | KURUMIMAME                   | Japan   | S-t                   |
| JP29213            | HIME DAIZU                   | Japan   | S-t                   |
| JP28320            | AKUDEN SHIRAZU               | Japan   | S-t                   |
| JP67662            | AOAKIMAME                    | Japan   | S-t                   |
| JP110355           | DAIZU                        | Japan   | S-t                   |
| JP29207            | CHUU TEPPOU                  | Japan   | S-t                   |
| JP87838            | DADACHAMAME                  | Japan   | S-t                   |
| JP27891            | KUROTOME                     | Japan   | S-t                   |
| JP27863            | KUROHIRA                     | Japan   | S-t                   |
| JP29217            | NAKAHATA ZAIRAI              | Japan   | S-m                   |
| JP29389            | AKA DAIZU                    | Japan   | S-t                   |
| JP76302            | AMAGI ZAIRAI 90D             | Japan   | S-t                   |
| JP73149            | KUROMAME                     | Japan   | S-t                   |
| JP29408            | COL/EHIME/1983/UTSUNOMIYA 22 | Japan   | S-t                   |
| JP208667           | KURAKAKE                     | Japan   | S-t                   |
| JP76321            | MAETSUE ZAIRAI 90B           | Japan   | S-m                   |
| No. N/A            | COL/TANBA/1989/ODAGAKI 2     | Japan   | S-t                   |
| JP27858            | SHIRATAMA                    | Japan   | S-t                   |
| JP28489            | KOSA MAME                    | Japan   | S-t                   |
| JP29363            | KOKUBU 7                     | Japan   | S-t                   |
| JP76560            | HITASHIMAME                  | Japan   | S-t                   |
| JP29413            | COL/EHIME/1983/UTSUNOMIYA 28 | Japan   | S-t                   |
| JP29427            | COL/EHIME/1983/UTSUNOMIYA 37 | Japan   | S-t                   |
| JP70093            | MOCHI-DAIZU                  | Japan   | S-t                   |
| JP28377            | KUMAJI 1                     | Japan   | S-t                   |
| JP29715            | ITSU.K.I ZAIRAI 83H          | Japan   | S-t                   |
| JP29696            | NANKAN ZAIRAI 83             | Japan   | S-t                   |
| JP28433            | HAI MAME                     | Japan   | S-t                   |
| JP29292            | SAGA ZAIRAI                  | Japan   | S-t                   |
| JP29493            | KOMUTA                       | Japan   | R                     |

Table S1. Cont.

| Accession no.*     | Accession name           | Country      | Sequence <sup>†</sup> |
|--------------------|--------------------------|--------------|-----------------------|
| JP29533            | BAN KURO DAIZU           | Japan        | S-t                   |
| JP27579            | GIN DAIZU                | Japan        | R                     |
| Jananese others    |                          |              |                       |
| JP28862            | ENREI                    | Japan        | S-t                   |
| JP29161            | NATTOU KOTSUBU           | Japan        | S-m                   |
| JP27439            | TOKACHI NAGAHA           | Japan        | S-t                   |
| JP29559            | AKISENGOKU               | Japan        | S-t                   |
| JP29668            | FU.K.UYUTAKA             | Japan        | S-t                   |
| JP53267            | SHIZUNDAIZU              | Japan        | S-t                   |
| JP29149            | CHIZU.K.A IBARAKI 1      | Japan        | S-t                   |
| JP53264            | OOYACHI 2                | Japan        | S-t                   |
| JP37744            | ONI HADAKA               | Japan        | S-t                   |
| JP27886            | MIYAGI SHIROME           | Japan        | S-t                   |
| JP227175           | KURODAIZU(GEIHOKU)       | Japan        | S-t                   |
| JP29184            | TAMAHOMARE               | Japan        | S-t                   |
| JP67990            | HIMESHIRAZU              | Japan        | S-t                   |
| JP227399           | COL/EHIME/1-2            | Japan        | S-t                   |
| JP67989            | TSURUSENGOKU             | Japan        | S-t                   |
| Chinese landraces  |                          |              |                       |
| JP28911            | MANSHUU                  | China        | S-t                   |
| JP28415            | RIGAI SEITOU             | China        | R                     |
| JP30007            | PEKIN DAI OUTOU          | China        | S-t                   |
| JP27605            | MASSHOKUTOU(KOU 502)     | China        | S-t                   |
| JP30090            | ICHIGUUHOU               | China        | R                     |
| JP27605            | MASSHOKUTOU(KOU 503)     | China        | S-t                   |
| JP30071            | CHOYOUTOU                | China        | R                     |
| JP28432            | PEKING                   | China        | R                     |
| JP35718            | ANTO SHOU.K.OKUTOU       | China        | R                     |
| JP30105            | BONGCHUNBAEKJAM          | China        | S-t                   |
| JP30072            | SENYOUTOU                | China        | R                     |
| JP27543            | HAKKA ZASHI              | China        | R                     |
| JP27584            | KARASUMAME               | China        | S-t                   |
| JP30025            | HAKUBI                   | China        | R                     |
| JP28298            | AOKIMAME                 | China        | R                     |
| JP29613            | MANSHUU MASSHOKUTOU      | China        | R                     |
| JP35719            | HAKUCHIKOU               | China        | R                     |
| JP30032            | BISHUU DAIZU             | China        | S-t                   |
| Korean landraces   |                          |              |                       |
| JP28912            | CHOUSENSHU(CHA)          | Korea        | S-m                   |
| JP27956            | NEZUMI META              | Korea        | S-m                   |
| JP27587            | SHIROSOTA                | Korea        | S-t                   |
| JP29496            | URONKON                  | Korea        | S-t                   |
| JP29781            | SEITA                    | Korea, South | S-t                   |
| JP35506            | KLS 203                  | Korea, South | S-t                   |
| JP29774            | CHUUHOKU 2               | Korea, South | S-t                   |
| JP35462            | CHIENEUM KONG            | Korea, South | S-m                   |
| JP29903            | KONGNAMUL KONG           | Korea, South | S-t                   |
| JP29881            | OKJO                     | Korea, South | S-t                   |
| JP29762            | HEAMNAM                  | Korea, South | S-t                   |
| JP29803            | HEU.K.DAELIP             | Korea, South | S-t                   |
| JP29789            | CHEONGYE MYONGTAE        | Korea, South | S-t                   |
| JP29827            | KEUMDU                   | Korea, South | S-t                   |
| JP29819            | JEOKGAK                  | Korea, South | S-t                   |
| JP29882            | ODU                      | Korea, South | R                     |
| JP29794            | GAPSANJELAE(I)           | Korea, South | R                     |
| SE Asian landraces |                          |              |                       |
| JP30174            | SANDEK SIENG             | Cambodia     | R                     |
| JP43384            | BARITOU 3 A              | Indonesia    | R                     |
| JP30207            | LOCAL VAR(SEPUTIH RAMAN) | Indonesia    | S-t                   |
| JP30206            | PETEK                    | Indonesia    | S-m                   |
| JP30216            | JAVA 5                   | Indonesia    | S-t                   |
| JP30213            | JAVA 7                   | Indonesia    | S-m                   |



Table S1. Cont.

| Accession no.*        | Accession name             | Country      | Sequence <sup>†</sup> |
|-----------------------|----------------------------|--------------|-----------------------|
| JP30210               | LOCAL VAR.(TEGINENENG)     | Indonesia    | S-t                   |
| JP35796               | KS 1034                    | Malaysia     | S-t                   |
| JP35788               | KE 32                      | Philippines  | R                     |
| JP35787               | L 2A                       | Philippines  | S-t                   |
| JP49014               | MISS 33 DIXI               | Philippines  | S-t                   |
| JP30146               | KARASUMAME(HEITOU)         | Taiwan       | R                     |
| JP31111               | POCHAL                     | Taiwan       | S-m                   |
| JP30138               | KARASUMAME(SHINCHIKU)      | Taiwan       | S-t                   |
| JP30147               | KARASUMAME(NAIHOU)         | Taiwan       | S-t                   |
| JP38385               | COL/THAI/1986/THAI-78      | Thailand     | R                     |
| JP38386               | COL/THAI/1986/THAI-80      | Thailand     | R                     |
| JP30176               | CHIENGMAI PALMETTO         | Thailand     | S-m                   |
| JP30179               | SAN SAI                    | Thailand     | S-t                   |
| SE Asia, others       |                            |              |                       |
| JP30196               | MERAPI                     | Indonesia(B) | S-m                   |
| JP30197               | RINGGIT                    | Indonesia(B) | S-m                   |
| South Asian landraces |                            |              |                       |
| JP30272               | PK 73-54                   | India        | R                     |
| JP30258               | M 581                      | India        | H                     |
| JP30238               | U 1416                     | India        | R                     |
| JP30335               | N 2295                     | India        | R                     |
| JP30349               | BHATMAS                    | India        | R                     |
| JP30311               | COL/PAK/1989/IBPGR/2326(1) | India        | R                     |
| JP30303               | M 44                       | India        | S-t                   |
| JP30409               | M 918                      | India        | R                     |
| JP30363               | HM 39                      | India        | S-t                   |
| JP40391               | M 42                       | Nepal        | S-t                   |
| JP40444               | U 1042-1                   | Nepal        | R                     |
| JP74676               | U 1290-1                   | Nepal        | R                     |
| JP40354               | U 8006-3                   | Nepal        | R                     |
| JP40382               | COL/PAK/1989/IBPGR/2323(2) | Nepal        | R                     |
| JP40403               | N 2392                     | Nepal        | R                     |
| JP40452               | N 2491                     | Nepal        | S-t                   |
| JP40464               | L 317                      | Nepal        | R                     |
| JP84093               | M 652                      | Nepal        | R                     |
| JP30419               | U-1741-2-2 NO.3            | Nepal        | R                     |
| JP40374               | KADI BHATTO                | Nepal        | S-t                   |
| JP74682               | E C 112828                 | Pakistan     | R                     |
| JP74681               | U 1155-4                   | Pakistan     | R                     |
| Others                |                            |              |                       |
| JP30465               | Fiskeby V                  | Sweden       | S-t                   |
| JP31043               | Williams 82                | USA          | R                     |

N/A, not available; SE, South East.

\*Accessions without numbers are not currently publicly available from the NIAS GenBank.

<sup>†</sup>Sequences "S-t", "S-m," and "R" are the same as those of Toyomusume, Misuzudaizu, and Hayahikari, respectively. "S-t" and "S-m" are of the SS genotype whereas "R" is of the SR genotype.

Table S2. Soybean accessions and their genotypes at the SNP of *Pdh1* and shattering scores

| Accession no.*               | Accession name                   | Province       | Country      | <i>Pdh1</i> <sup>†</sup> | Shattering score <sup>‡</sup> |
|------------------------------|----------------------------------|----------------|--------------|--------------------------|-------------------------------|
| Landraces (East Asia)        |                                  |                |              |                          |                               |
| PI089138                     | Zontanoruk-on                    | Hamgyong Puk   | Korea, North | R                        | —                             |
| PI097094                     | N/A                              | Hwanghae Puk   | Korea, North | R                        | 1.0                           |
| PI398296                     | N/A                              | Kyonggi        | Korea, South | S                        | 3.0                           |
| PI 399043                    | N/A                              | Cheju          | Korea, South | S                        | 3.0                           |
| PI 407801                    | N/A                              | Kyonggi        | Korea, South | S                        | 2.0                           |
| PI 407849                    | N/A                              | Cholla Puk     | Korea, South | S                        | 3.5                           |
| PI 408342                    | N/A                              | Cheju          | Korea, South | S                        | 3.5                           |
| PI 423954                    | Shirome                          | Kumamoto       | Japan        | S                        | —                             |
| PI 423967                    | Nabeshima                        | Kumamoto       | Japan        | S                        | —                             |
| PI 424391                    | N/A                              | Cholla Puk     | Korea, South | S                        | 2.5                           |
| PI 567258                    | He pi dou                        | Jiangxi        | China        | S                        | 4.0                           |
| PI 567293                    | Ben di huang dou                 | Gansu          | China        | R                        | 1.0                           |
| PI 567298                    | Chan yao dou                     | Gansu          | China        | R                        | 2.5                           |
| PI 567368                    | Xi he huang dou                  | Ningxia        | China        | R                        | 1.0                           |
| PI 567395                    | Lai wa dou                       | Shaanxi        | China        | S                        | 1.0                           |
| PI 567481                    | Bao ding huang dou               | Hebei          | China        | R                        | 1.0                           |
| PI 567503                    | Niu mao huang                    | Hebei          | China        | R                        | 1.5                           |
| PI 567525                    | Cao qing huang dou               | Shandong       | China        | R                        | 2.5                           |
| PI 567700                    | Fu yang (19)                     | Anhui          | China        | R                        | 1.5                           |
| PI 587552                    | Nan jing da ping ding huang yi 1 | Jiangsu        | China        | R                        | 4.0                           |
| PI 587666                    | Er dao zao                       | Anhui          | China        | R                        | 2.5                           |
| PI 587752                    | Xian ning dong huang dou jia     | Hubei          | China        | R                        | 2.0                           |
| PI 587799                    | Wu chang zao huang dou           | Hubei          | China        | R                        | 2.0                           |
| PI 587946                    | Ping nan qiu da dou              | Fujian         | China        | S                        | —                             |
| PI 588000                    | Shi yue huang                    | Sichuan        | China        | S                        | —                             |
| PI 588047                    | Huang ke wu dou                  | Guangdong      | China        | R                        | —                             |
| PI 588053A                   | Xiao li huang                    | Guangdong      | China        | S                        | 4.5                           |
| PI 594451                    | Liu yue bao                      | Sichuan        | China        | S                        | 3.5                           |
| PI 594554                    | Huang pi tian dou                | Jiangxi        | China        | S                        | —                             |
| PI 594579                    | Zhong he tian cheng dou          | Hunan          | China        | R                        | 3.5                           |
| PI 594597                    | Ning yuan ba yue huang           | Hunan          | China        | S                        | —                             |
| PI 594615                    | Liu yue zao                      | Guizhou        | China        | R                        | 2.0                           |
| PI 594629                    | Xiao hua lian                    | Guizhou        | China        | S                        | 4.0                           |
| PI 594770A                   | Fu sui chang ping hei dou        | Guangxi        | China        | R                        | —                             |
| PI 594773                    | Fu sui qu li dou                 | Guangxi        | China        | R                        | —                             |
| PI 594777                    | Liu yue huang                    | Yunnan         | China        | S                        | 3.5                           |
| PI 594788                    | Da zao dou                       | Yunnan         | China        | S                        | —                             |
| PI 602991                    | Niu jiao qi da hei dou           | Shandong       | China        | R                        | 3.5                           |
| PI 603318                    | N/A                              | Heilongjiang   | China        | R                        | 2.5                           |
| PI 603336                    | N/A                              | Heilongjiang   | China        | R                        | 2.5                           |
| PI 603357                    | N/A                              | Jilin          | China        | R                        | 1.0                           |
| PI 603384                    | N/A                              | Jilin          | China        | R                        | 2.5                           |
| PI 603420                    | N/A                              | Nei Monggol    | China        | R                        | 3.5                           |
| PI 603424A                   | N/A                              | Nei Monggol    | China        | R                        | —                             |
| PI 603516                    | N/A                              | Shaanxi        | China        | S                        | 2.5                           |
| PI 603596                    | N/A                              | Fujian         | China        | S                        | 5.0                           |
| PI 603675                    | N/A                              | Jiangsu        | China        | S                        | 2.5                           |
| Old North American cultivars |                                  |                |              |                          |                               |
| PI548362                     | Lincoln                          | Unknown        | Unknown      | R                        | —                             |
| PI 548379                    | Mandarin (Ottawa)                | Heilongjiang   | China        | R                        | —                             |
| PI 548445                    | CNS                              | Jiangsu        | China        | S                        | 1.0                           |
| PI 548406                    | Richland                         | Jilin          | China        | R                        | —                             |
| PI 548488                    | S-100                            | Missouri       | USA          | R                        | 2.5                           |
| PI 548477                    | Ogden                            | Tennessee      | USA          | R                        | 2.0                           |
| PI 548298                    | AK [Harrow]                      | Unknown        | China        | R                        | —                             |
| PI 548318                    | Dunfield                         | Jilin          | China        | R                        | —                             |
| PI 548391                    | Mukden                           | Liaoning       | China        | R                        | —                             |
| PI 548657                    | Jackson                          | North Carolina | USA          | R                        | 1.0                           |
| PI 548348                    | Illini                           | Unknown        | China        | R                        | —                             |
| PI 548485                    | Roanoke                          | Jiangsu        | China        | R                        | 1.0                           |
| PI 548311                    | Capital                          | Ontario        | Canada       | R                        | —                             |
| PI 548603                    | Perry                            | Indiana        | USA          | R                        | —                             |

Table S2. Cont.

| Accession no.*                  | Accession name | Province         | Country      | <i>Pdh1</i> <sup>†</sup> | Shattering score <sup>‡</sup> |
|---------------------------------|----------------|------------------|--------------|--------------------------|-------------------------------|
| PI 548382                       | Manitoba Brown | Liaoning         | China        | S                        | —                             |
| PI 548456                       | Haberlandt     | Pyongyang        | Korea, North | S                        | 2.5                           |
| FC 33243                        | Anderson       | Unknown          | Unknown      | R                        | —                             |
| Modern North American cultivars |                |                  |              |                          |                               |
| PI 556511                       | A3127          | Michigan         | USA          | R                        | —                             |
| PI 533655                       | Burlison       | Illinois         | USA          | R                        | 1.0                           |
| PI 548512                       | Century        | Indiana          | USA          | R                        | 1.0                           |
| PI 525453                       | Conrad         | Iowa             | USA          | R                        | 1.0                           |
| PI 508083                       | Dassel         | Minnesota        | USA          | R                        | —                             |
| PI 513382                       | Glenwood       | Minnesota        | USA          | R                        | —                             |
| PI 553047                       | Gordon         | Georgia          | USA          | R                        | 1.0                           |
| PI 540552                       | Hoyt           | Ohio             | USA          | R                        | 1.3                           |
| PI 518664                       | Hutcheson      | Virginia         | USA          | R                        | 1.0                           |
| PI 548985                       | Kershaw        | South Carolina   | USA          | R                        | 2.0                           |
| PI 533602                       | Lloyd          | Arkansas         | USA          | R                        | 1.0                           |
| PI 548643                       | Maple Glen     | Ontario (Ottawa) | Canada       | R                        | —                             |
| PI 548638                       | OAC Libra      | Ontario (Guelph) | Canada       | S                        | —                             |
| PI 548644                       | OAC Musca      | Ontario (Guelph) | Canada       | R                        | —                             |
| PI 515961                       | Pennyrile      | Kentucky         | USA          | R                        | 1.8                           |
| PI 536637                       | Perrin         | South Carolina   | USA          | R                        | 1.5                           |
| PI 548604                       | Pershing       | Missouri         | USA          | R                        | 1.0                           |
| PI 548520                       | Preston        | Iowa             | USA          | R                        | 1.3                           |
| PI 536636                       | Ripley         | Ohio             | USA          | R                        | 1.0                           |
| PI 536635                       | Sprite         | Ohio             | USA          | R                        | 1.0                           |
| PI 522236                       | Thomas         | Georgia          | USA          | R                        | 1.0                           |
| PI 548524                       | Weber          | Iowa             | USA          | R                        | 1.0                           |
| PI 508266                       | Young          | North Carolina   | USA          | R                        | 1.5                           |
| PI 548634                       | Zane           | Ohio             | USA          | R                        | 1.25                          |
| Old Japanese cultivars          |                |                  |              |                          |                               |
| JP28882, PI 594233 A            | Nourin 1       | Ibaraki          | Japan        | S                        | 4.0                           |
| PI495235                        | Nourin 2       | Ibaraki          | Japan        | S                        | 4.5                           |
| JP28883, PI 417200              | Nourin 3       | Ibaraki          | Japan        | S                        | 3.5                           |
| JP27806, PI 594238              | Nourin 4       | Akita            | Japan        | S                        | 2.0                           |
| JP27807                         | Nourin 5       | Akita            | Japan        | S                        | —                             |
| JP27806                         | Tamamusume     | Ibaraki          | Japan        | S                        | —                             |
| JP27808                         | Darumamasari   | Akita            | Japan        | S                        | —                             |
| JP27809                         | Ugodaizu       | Akita            | Japan        | S                        | —                             |
| JP29556, PI 592904              | Hougyoku       | Kumamoto         | Japan        | S                        | 2.0                           |
| JP28491                         | Shinmejiro     | Ibaraki          | Japan        | S                        | —                             |
| JP29552                         | Asomasari      | Kumamoto         | Japan        | S                        | —                             |
| JP27810                         | Waseshiroge    | Akita            | Japan        | S                        | —                             |
| JP29639, PI 423959              | Asomusume      | Kumamoto         | Japan        | S                        | 2.0                           |
| JP27413                         | Hokkaihadaka   | Hokkaido         | Japan        | S                        | —                             |
| JP29504                         | Koganeidaizu   | Saga             | Japan        | S                        | —                             |
| JP27406, PI 424199              | Karikachi      | Hokkaido         | Japan        | S                        | 1.0                           |
| JP27811, PI 416913              | Hatsukari      | Akita            | Japan        | S                        | 3.5                           |
| JP28492, PI 360848              | Tachisuzunari  | Ibaraki          | Japan        | S                        | 2.5                           |
| JP29505, PI 417274              | Sayohime       | Saga             | Japan        | S                        | 3.5                           |
| JP27412                         | Nagahajiro     | Hokkaido         | Japan        | S                        | —                             |
| JP27407                         | Shinsei        | Hokkaido         | Japan        | S                        | —                             |
| JP27436, PI 317335              | Koganejiro     | Hokkaido         | Japan        | S                        | 1.5                           |
| JP27408                         | Tokachishiro   | Hokkaido         | Japan        | R                        | —                             |
| JP27696, PI 342004              | Nemashirazu    | Akita            | Japan        | S                        | 2.0                           |
| JP28493                         | Bonmimori      | Ibaraki          | Japan        | S                        | —                             |
| JP28494, PI 360842              | Okumejiro      | Ibaraki          | Japan        | S                        | 1.5                           |
| JP29506, PI 423987 A            | Fujimusume     | Saga             | Japan        | S                        | 3.5                           |
| JP28861, PI 360847              | Shiromeyutaka  | Nagano           | Japan        | S                        | 2.5                           |
| JP29559                         | Akisengoku     | Kumamoto         | Japan        | S                        | —                             |
| Modern Japanese cultivars       |                |                  |              |                          |                               |
| N/A (Nagano)                    | Tamadaikoku    | Nagano           | Japan        | S                        | S                             |
| N/A (Hokkaido)                  | Iwaikuro       | Hokkaido         | Japan        | S                        | S                             |
| N/A (Hokkaido)                  | Hayahikari     | Hokkaido         | Japan        | R                        | R                             |

Table S2. Cont.

| Accession no.*     | Accession name | Province     | Country      | <i>Pdh1</i> <sup>†</sup> | Shattering score <sup>‡</sup> |
|--------------------|----------------|--------------|--------------|--------------------------|-------------------------------|
| N/A (Tohoku)       | Oosuzu         | Akita        | Japan        | S                        | M                             |
| N/A (Nagano)       | Tamamasari     | Nagano       | Japan        | S                        | S                             |
| N/A (Nagano)       | Suzukogane     | Nagano       | Japan        | S                        | M                             |
| N/A (Tohoku)       | Tamaurara      | Akita        | Japan        | S                        | S                             |
| N/A (Tohoku)       | Hatayutaka     | Akita        | Japan        | S                        | M                             |
| N/A (Nagano)       | Ayakogane      | Nagano       | Japan        | S                        | M                             |
| N/A (Kyushu)       | Erusuta        | Kumamoto     | Japan        | S                        | S                             |
| N/A (Kyushu)       | Sachiyutaka    | Kumamoto     | Japan        | S                        | S                             |
| N/A (Tohoku)       | Yumeminori     | Akita        | Japan        | S                        | M                             |
| N/A (Hokkaido)     | Yukihomare     | Hokkaido     | Japan        | R                        | R                             |
| N/A (Nagano)       | Suzukomachi    | Nagano       | Japan        | R                        | R                             |
| N/A (Kyushu)       | Kiyomidori     | Kumamoto     | Japan        | S                        | R                             |
| N/A (Tohoku)       | Fukuibuki      | Akita        | Japan        | S                        | M                             |
| N/A (Tohoku)       | Aomarukun      | Akita        | Japan        | R                        | R                             |
| N/A (Hokkaido)     | Yukishizuka    | Hokkaido     | Japan        | S                        | M                             |
| N/A (Tohoku)       | Suzusayaka     | Akita        | Japan        | S                        | M                             |
| N/A (Nagano)       | Tsubuhomare    | Nagano       | Japan        | S                        | M                             |
| N/A (Tohoku)       | Suzukaori      | Nagano       | Japan        | S                        | M                             |
| N/A (Kyushu)       | Kurodamaru     | Kumamoto     | Japan        | S                        | R                             |
| N/A (Nagano)       | Tsuyamohomare  | Nagano       | Japan        | R                        | R                             |
| N/A (Tohoku)       | Kinusayaka     | Akita        | Japan        | S                        | M                             |
| N/A (Hokkaido)     | Toyoharuka     | Hokkaido     | Japan        | S                        | M                             |
| N/A (Kyushu)       | Kotoyutaka     | Kumamoto     | Japan        | S                        | S                             |
| N/A (Hokkaido)     | Yukipirika     | Hokkaido     | Japan        | S                        | S                             |
| N/A (Nagano)       | Tachihomare    | Nagano       | Japan        | S                        | M                             |
| N/A (Tohoku)       | Suzuhonoka     | Akita        | Japan        | S                        | M                             |
| Glycine soja       |                |              |              |                          |                               |
| PI 339871A         | N/A            | Cheju        | Korea, South | S                        | —                             |
| PI 366120          | N/A            | Akita        | Japan        | S                        | —                             |
| PI 393551          | N/A            | Taiwan       | Taiwan       | S                        | —                             |
| PI 407027          | N/A            | Akita        | Japan        | S                        | —                             |
| PI 407131          | N/A            | Kumamoto     | Japan        | S                        | —                             |
| PI 407140          | N/A            | Kumamoto     | Japan        | S                        | —                             |
| PI 407170          | N/A            | Kyonggi      | Korea, South | S                        | —                             |
| PI 407275          | N/A            | Kyonggi      | Korea, South | S                        | —                             |
| PI 407282          | N/A            | Cheju        | Korea, South | S                        | —                             |
| PI 407288          | N/A            | Jilin        | China        | S                        | —                             |
| PI 407301          | N/A            | Jiangsu      | China        | S                        | —                             |
| PI 447004          | N/A            | Jilin        | China        | S                        | —                             |
| PI 458536          | N/A            | Heilongjiang | China        | S                        | —                             |
| PI 458538          | N/A            | Heilongjiang | China        | S                        | —                             |
| PI 464935          | N/A            | Jiangsu      | China        | S                        | —                             |
| PI 468400A         | N/A            | Ningxia      | China        | S                        | —                             |
| PI 483464A         | N/A            | Ningxia      | China        | S                        | —                             |
| PI 483465          | N/A            | Shaanxi      | China        | S                        | —                             |
| PI 518282          | N/A            | Unknown      | Taiwan       | S                        | —                             |
| PI 549046          | N/A            | Shaanxi      | China        | S                        | —                             |
| PI 562559          | N/A            | Cholla Puk   | Korea, South | S                        | —                             |
| PI 562565          | N/A            | Cholla Puk   | Korea, South | S                        | —                             |
| PI 597459D         | N/A            | Shandong     | China        | S                        | —                             |
| PI 326582A         | N/A            | Primorye     | Russia       | S                        | —                             |
| PI 468916          | N/A            | Liaoning     | China        | S                        | —                             |
| Others             |                |              |              |                          |                               |
| PI 548573          | Harosoy        | Ontario      | Canada       | R                        | —                             |
| JP27423, PI 360850 | Wasekogane     | Hokkaido     | Japan        | R                        | 1.0                           |
| JP86520, PI 593971 | Kariyutaka     | Hokkaido     | Japan        | R                        | 2.0                           |
| N/A (Hokkaido)     | Takei 992      | Hokkaido     | Japan        | R                        | —                             |
| PI 597482          | Sinpaldalkong  | Suweon       | Korea, South | R                        | 1.0                           |
| PI 540556          | Jack           | Illinois     | USA          | R                        | 1.0                           |
| JP27541, PI 594301 | Toyomusume     | Hokkaido     | Japan        | S                        | 4.0                           |
| JP28862, PI 385942 | Enrei          | Nagano       | Japan        | S                        | 2.5                           |
| N/A (Hokkaido)     | Shokukei 32    | Hokkaido     | Japan        | S                        | —                             |

**Table S2. Cont.**

| Accession no.*     | Accession name | Province        | Country      | <i>Pdh1</i> <sup>†</sup> | Shattering score <sup>‡</sup> |
|--------------------|----------------|-----------------|--------------|--------------------------|-------------------------------|
| JP67666, PI 561396 | Tachinagaha    | Nagano          | Japan        | S                        | 3.5                           |
| PI 416937          | Houjaku Kuwazu | Kanto and Tosan | Japan        | S                        | 3.0                           |
| JP29668, PI 506675 | Fukuyutaka     | Kumamoto        | Japan        | S                        | 2.0                           |
| JP68385, PI 561395 | Suzuyutaka     | Akita           | Japan        | S                        | 4.5                           |
| PI 594021          | Keunolkong     | Yeongnam        | Korea, South | S                        | —                             |
| JP28856, PI 507045 | Misuzudaizu    | Nagano          | Japan        | S                        | 3.0                           |

N/A, not available; —, none.

\*Accessions whose numbers are prefixed as indicated were kindly provided by the following agencies: PI or FC, the Agricultural Research Service of the USDA; JP, NIAS, Japan; N/A (Nagano), Nagano Vegetable and Ornamental Crops Experiment Station, Japan; N/A (Hokkaido), Agricultural Research Department of Hokkaido Research Organization, Japan; N/A (Tohoku) or N/A (Kyushu), NARO.

<sup>†</sup>"S" and "R" indicate shattering-susceptible and shattering-resistant genotypes at the SNP of *Pdh1*.

<sup>‡</sup>Shattering scores of accessions with PI numbers indicate the "SHATLATE" values published by the Germplasm Resources Information Network, USDA ([www.ars-grin.gov](http://www.ars-grin.gov)). Scores are based on the percentage of open pods 2 wk after harvest, as follows: 1, no shattering; 2, 1–10%; 3, 10–25%; 4, 25–50%; 5, >50%. For Japanese modern cultivars, the degrees of shattering resistance are shown as follows (based on the data registered with the Ministry of Agriculture, Forestry, and Fisheries, Japan): "S", shattering-susceptible; "M", moderate shattering; "R", shattering-resistant.

**Table S3. Primers used in this study**

| Purpose                | ID                              | Direction                 | 5'-primer sequence-3'                           | Remarks                                    |
|------------------------|---------------------------------|---------------------------|-------------------------------------------------|--------------------------------------------|
| Mapping                | Sca184_401k                     | F                         | TGCTCCATGTGCTATATAATGCT                         | Position:29547k, Indel                     |
|                        |                                 | R                         | AAGCTCGTTCTTGTGTGATGG                           |                                            |
|                        | SRM0                            | F                         | GCCAGCCTTGTCTGTCAATTT                           | Position:29573k, Indel                     |
|                        |                                 | R                         | TGATGATCAATGGTCAGATTCA                          |                                            |
|                        | scr2_gap                        | F                         | CCCTACAATTACCCACCAA                             | Position:29595k, Indel                     |
|                        |                                 | R                         | GCACGGATAAGCTCTTCGAT                            |                                            |
|                        | scr2_SNP1                       | F                         | CCCTACAATTACCCACCAA                             | Position:29596k, SNP                       |
|                        |                                 | R                         | TCTGACTTCCACAGCAAAATATCCACACCA                  |                                            |
|                        | Gm16_29608k_SNP                 | F                         | TTCTAGAAACGTGGCAATCG                            | Position:29608k, SNP                       |
|                        |                                 | R                         | CCATCTTCTACTTGAATTTGGCTA                        |                                            |
|                        | Gm16_29616k_ID                  | F                         | CAACCCATTCAATTAGGCTCA                           | Position:29616k, Indel                     |
|                        |                                 | R                         | TCAACGAAGTAAAGTTTAAACACCA                       |                                            |
|                        | Gm16_29622k_ID                  | F                         | TGATGCTCTGTAACTTGAGATGATG                       | Position:29622k, Indel                     |
|                        |                                 | R                         | ATAACTCAACGGCTCAGCTCCTCAA                       |                                            |
| SRM1                   | F                               | AGAGCAAGAAATCACGTTGCA     | Position:29634k, Indel                          |                                            |
|                        | R                               | CACCTCACCCCTTTTCTCA       |                                                 |                                            |
| Sca184_281k (SRM2)     | F                               | AATCGTATTAATAATGAAGGCATGT | Position:29667k, Indel                          |                                            |
|                        | R                               | AGGGGTTGAGGATGAGGAGT      |                                                 |                                            |
| Sca184_267k            | F                               | GGTGTTTGCTCGTTAATGG       | Position:29681k, Indel                          |                                            |
|                        | R                               | TCACCTACATGCATGCAACC      |                                                 |                                            |
| Genomic cloning        | Glyma16g25570.1                 | F                         | TCTGACTTCCACAGCAAAATATCCACACCA                  |                                            |
|                        | Glyma16g25580.1 ( <i>Pdh1</i> ) | R                         | AGGCAAGCAAGTTTAGGGCATCTTACGTA                   |                                            |
|                        |                                 | F                         | GGCTCTAAAAATGCATCAATCACTGGTCCAA                 |                                            |
| RT-PCR                 | Glyma16g25570.1                 | R                         | CAACAAAACCACCGTCAACCATAAATGAGA                  | ORF1                                       |
|                        |                                 | F                         | GAGGGAGGCGTTTTACGAC                             |                                            |
|                        | Glyma16g25580.1 ( <i>Pdh1</i> ) | R                         | GACGTGGCAACCATGACTC                             | ORF2                                       |
| F                      |                                 | CGAAGCCGAAATAAACTTG       |                                                 |                                            |
| CYP2                   |                                 | R                         | ACAGCACTGATCATCGTGGA                            |                                            |
|                        |                                 | F                         | CGGGACCAGTGTGCTTCTTCA                           |                                            |
| 5' RACE                | DIR5RACE1st                     | R                         | CCCCTCCACTACAAAGGCTCG                           |                                            |
|                        |                                 | F                         | —                                               | Reverse transcription                      |
| 3' RACE                | Oligo(dT) adapter               | R                         | GTTAAGTTTGCACCTTCT                              |                                            |
|                        |                                 | F                         | GGCCACGCGTCGACTAGTACGGGIIGGGIIGGGIIG            |                                            |
|                        |                                 | R                         | TAAGTGCTTGCATGGTGCAT                            |                                            |
|                        |                                 | F                         | GGCCACGCGTCGACTAGTAC                            |                                            |
| 3' RACE                | DIR3RACE2nd                     | R                         | AAGAACACAACGAGGGCAAC                            |                                            |
|                        |                                 | R                         | GGCCACGCGTCGACTAGTACTTTTTTTTTTTTTTTTT           |                                            |
|                        |                                 | F                         | GCCCTCGTTGTGTTCTTCAT                            |                                            |
|                        |                                 | R                         | GGCCACGCGTCGACTAGTAC                            |                                            |
| 3' RACE                | DIR3RACE3rd                     | F                         | GGTAGGGCACAAGGCTCTTA                            |                                            |
|                        |                                 | R                         | GGCCACGCGTCGACTAGTAC                            |                                            |
|                        |                                 | F                         | AGTCCTTTCCCTATTTCAAAGTCCTCT                     |                                            |
|                        |                                 | R                         | TTCTTGGTGTGCTAAATGTAAGAGCCT                     |                                            |
| In situ hybridization  | In situ probe                   | F                         | AGTCCTTTCCCTATTTCAAAGTCCTCT                     |                                            |
|                        |                                 | R                         | TTCTTGGTGTGCTAAATGTAAGAGCCT                     |                                            |
| <i>Pdh1</i> SNP        | Dir_CAPS                        | F                         | GCCCTCGTTGTGTTCTTCAT                            | SNP                                        |
|                        |                                 | R                         | GCGTTGCTTCCGTTGTAGAT                            |                                            |
| <i>Pdh1</i> sequencing | Dir_SNP_ARMS                    | F                         | CTCTTGGCATAGCTAGGGAAAAGCACTA                    |                                            |
|                        |                                 | R                         | GAAAACCCTATGTTTCCGAAGTGAAC                      |                                            |
|                        |                                 | F                         | GAAGAGGCCACAACATGCACCATACT                      |                                            |
|                        |                                 | R                         | TGTCGTGGAAGAAGAGGACTAAGTGTTC                    |                                            |
| <i>Pdh1</i> sequencing | Pdh1seq                         | F                         | GGCATAGCTAGGGAAAAGCAC                           | Table S1                                   |
|                        |                                 | R                         | CCATTTATTTTAGTAAACAACTTTTCATG                   |                                            |
| Transformation         | DirigentG                       | F                         | TGAACAAAATCTCACGGATTACATCAGCA                   |                                            |
|                        |                                 | R                         | <u>GAGCTCAATATGGAATTAAGTCCGAACCAGACTAGTCACC</u> | Underlined: addition of a <i>SacI</i> site |

—, none.
